# Supplementary material for: Influence of Self-Efficacy and Motivation to Follow a Healthy Diet on Life Satisfaction of Patients with Cardiovascular Disease: A Longitudinal Study
Source: PubMed Central journal article supplement (PMC7400119; doi:10.3390/nu12071903), 2020-06-27
Supplement: nutrients-12-01903-s001.pdf [file nutrients-12-01903-s001.pdf]

Supplementary Materials:

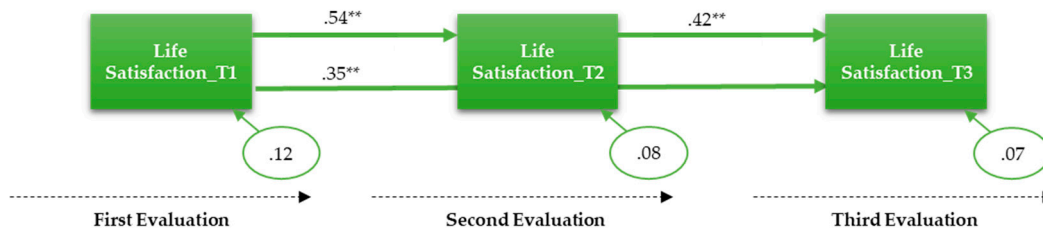

**Figure S1.** Model 0: Predictive model of life satisfaction in CVD patients considering only life satisfaction over time. Standardized coefficients and error terms (circles) are specified. \*\*  $p < .001$ .

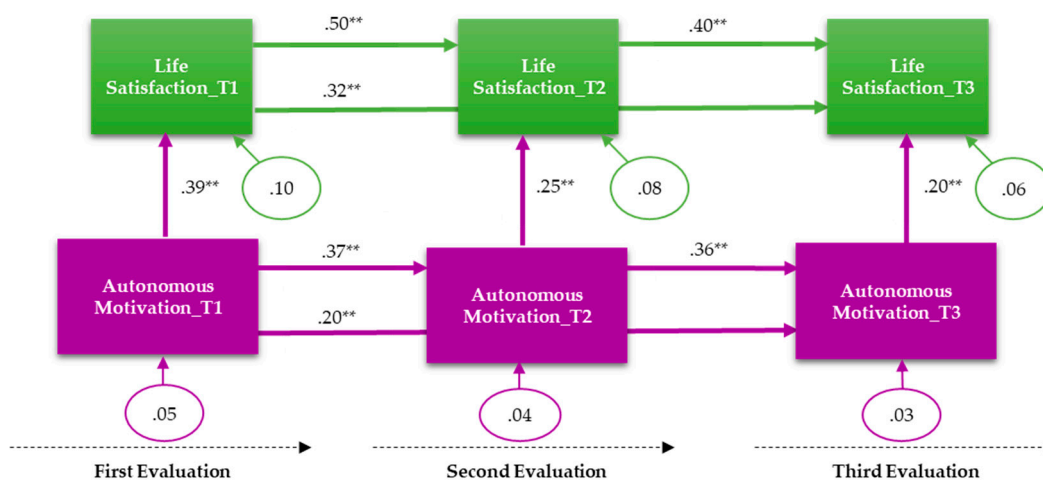

**Figure S2.** Model 1: Predictive model of life satisfaction in CVD patients considering only life satisfaction and autonomous motivation over time. Standardized coefficients and error terms (circles) are specified. \*\*  $p < .001$ .

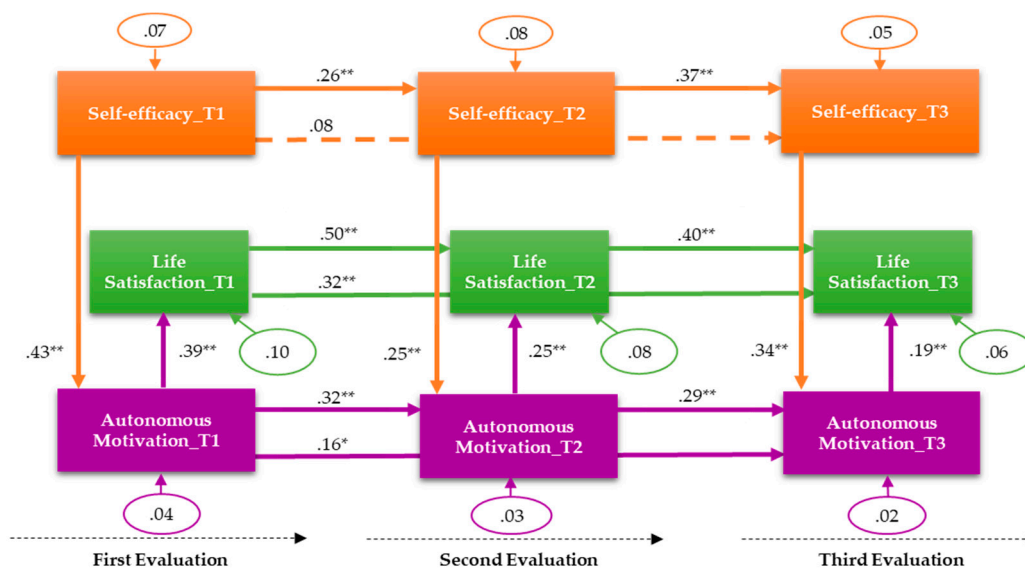

**Figure S3.** Model 2: Predictive model of life satisfaction in CVD patients considering life satisfaction, autonomous motivation and self-efficacy over time. Standardized coefficients and error terms (circles) are specified. \*\*  $p < .001$ ; \*  $p < .05$ . Pathway with dashed lines means non-significant relations ( $p > .05$ ).

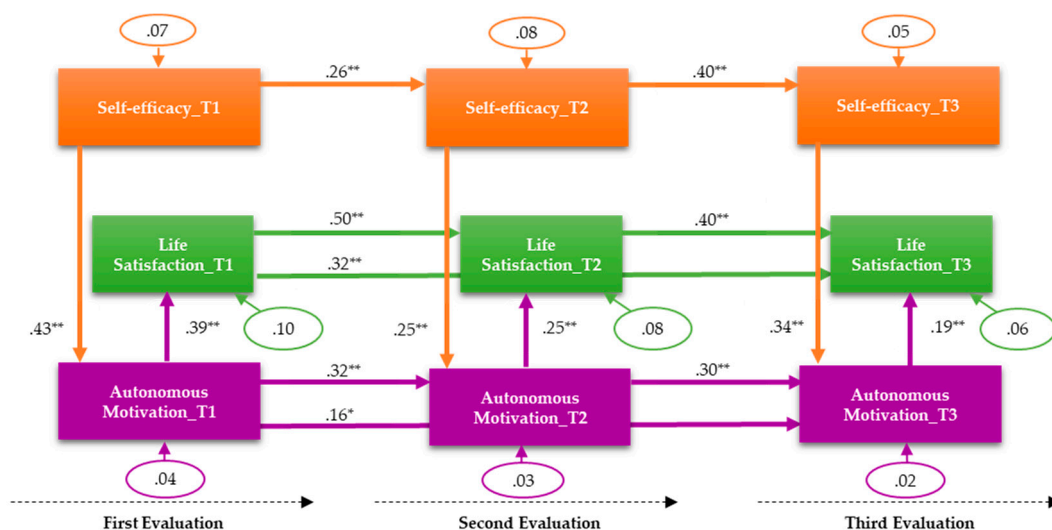

**Figure S4.** Model 3: Predictive model of life satisfaction in CVD patients considering life satisfaction, autonomous motivation and self-efficacy over time. Standardized coefficients and error terms (circles) are specified. \*\*  $p < .001$ ; \*  $p < .05$ .

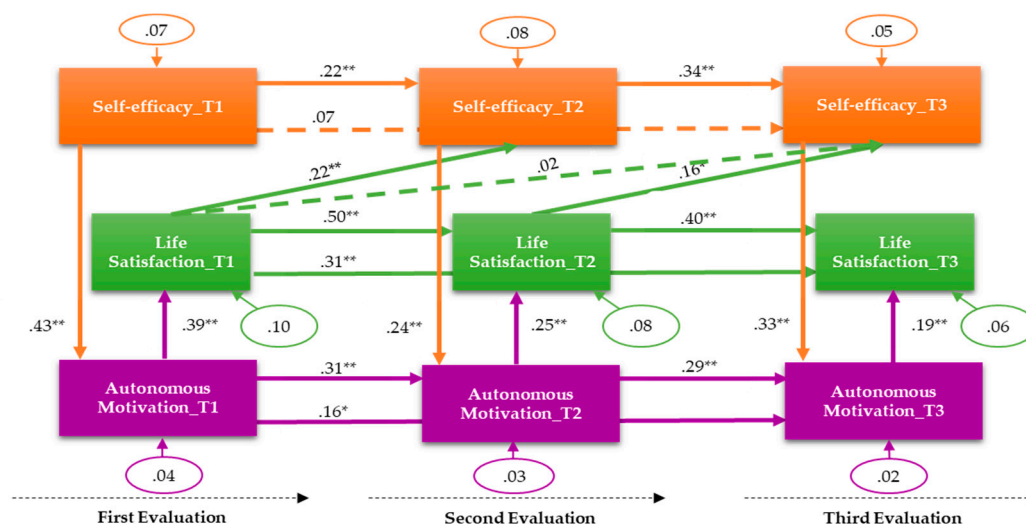

**Figure S5.** Model 4: Predictive model of life satisfaction in CVD patients considering life satisfaction, autonomous motivation and self-efficacy over time, and the influence of life satisfaction over later measurements of self-efficacy. Standardized coefficients and error terms (circles) are specified. \*\*  $p < .001$ ; \*  $p < .05$ . Pathways with dashed lines mean non-significant relations ( $p > .05$ ).

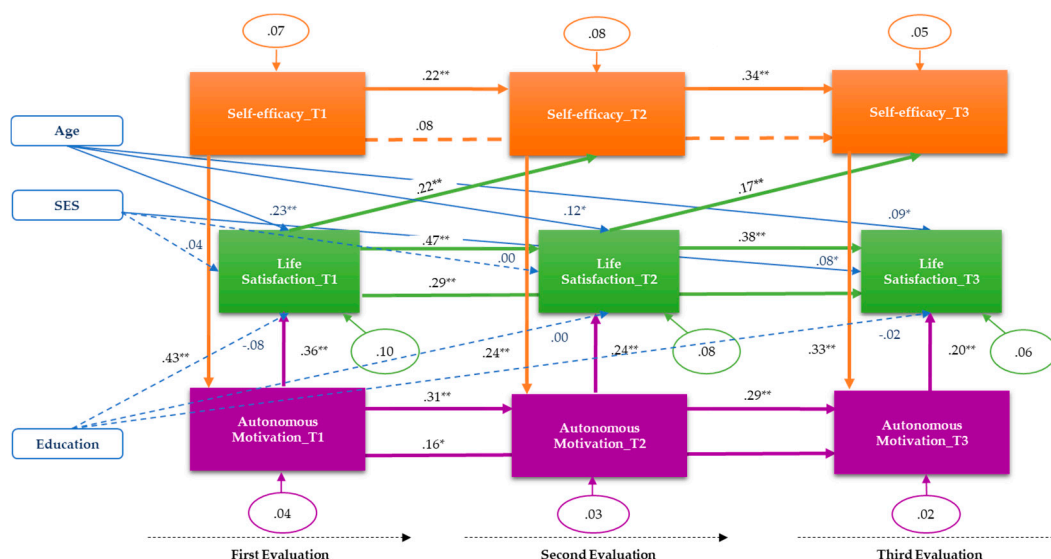

**Figure S6.** Model 6: Predictive model of life satisfaction in CVD patients considering life satisfaction, autonomous motivation and self-efficacy over time, the influence of life satisfaction over later measurements of self-efficacy, and the influence of sociodemographic variables. Standardized coefficients and error terms (circles) are specified. \*\*  $p < .001$ ; \*  $p < .05$ . Pathways with dashed lines mean non-significant relations ( $p > .05$ ). SES = Socioeconomic status.

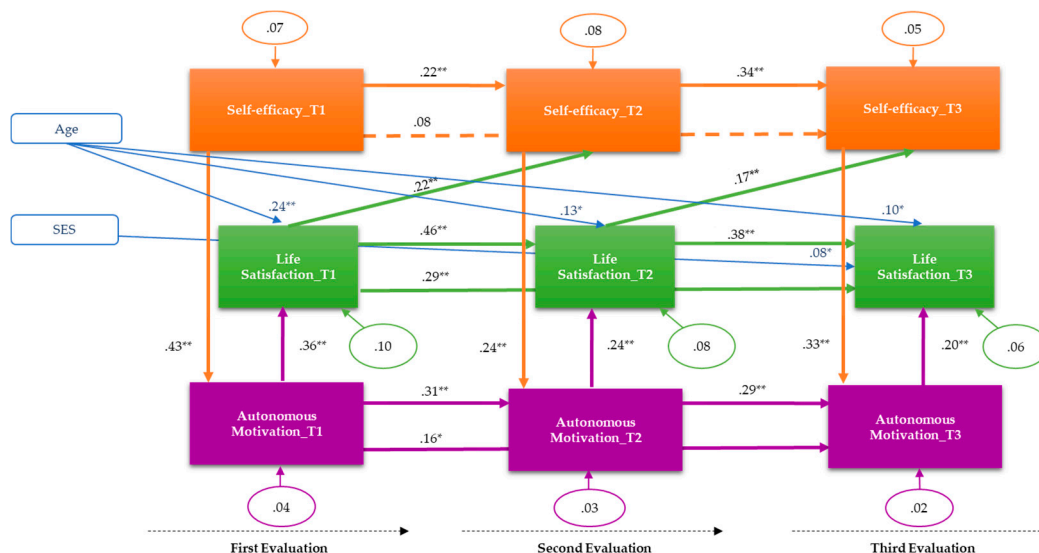

**Figure S7.** Model 7: Predictive model of life satisfaction in CVD patients considering life satisfaction, autonomous motivation and self-efficacy over time, the influence of life satisfaction over later measurements of self-efficacy, and the influence of sociodemographic variables. Standardized coefficients and error terms (circles) are specified. \*\*  $p < .001$ ; \*  $p < .05$ . SES = Socioeconomic status.

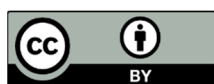

© 2020 by the authors. Licensee MDPI, Basel, Switzerland. This article is an open access article distributed under the terms and conditions of the Creative Commons Attribution (CC BY) license (<http://creativecommons.org/licenses/by/4.0/>).
